# Supplementary material
Source: PubMed Central journal article supplement (PMC9666550)
Supplement: 41541_2022_566_MOESM1_ESM.pdf [file 41541_2022_566_MOESM1_ESM.pdf]

**Supplementary Table S1.** Cohort description.

| <b>Regimen of vaccination</b>                                             | <b>Homologous</b> | <b>Heterologous</b> |
|---------------------------------------------------------------------------|-------------------|---------------------|
| <b>Number of participants</b>                                             | 48                | 10                  |
| <b>Age,</b><br>years, median (range)                                      | 27 (18 – 73)      | 27.5 (23 – 39)      |
| Female                                                                    | 23                | 4                   |
| Male                                                                      | 25                | 6                   |
| <b>First dose</b><br>Gam-COVID-Vac (Ad26)                                 | 48                | 10                  |
| <b>Second dose</b><br>Gam-COVID-Vac (Ad5)                                 | 48                | 10                  |
| <b>Booster vaccine</b><br>Gam-COVID-Vac (Ad26)<br>Pfizer                  | 48<br>0           | 0<br>10             |
| <b>Time between prime vaccination and booster</b><br>days, median (range) | 273 (249 – 300)   | 282 (267 – 328)     |
| <b>Probe sampling after booster,</b><br>days, median (range)              | 33 (29 – 41)      | 42 (38 – 49)        |
| Fever                                                                     | 14 (29%)          | 6 (60%)             |
| Injection site reactions                                                  | 22 (46%)          | 9 (90%)             |
| Weakness                                                                  | 21 (44%)          | 7 (7%)              |
| Headache                                                                  | 6 (13%)           | 2 (2%)              |

### Ad5-specific NABs

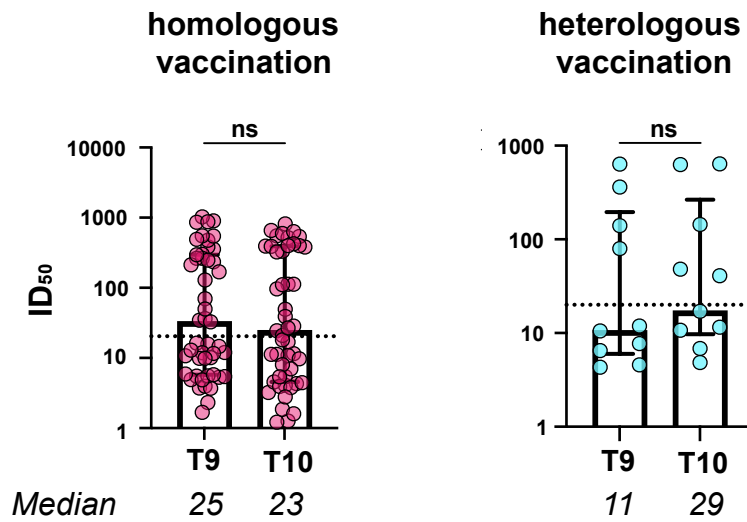

**Supplementary Figure S1.** The levels of Ad5-specific NABs before (T9) and after (T10) homologous (Gam-COVID-Vac/Gam-COVID-Vac) or heterologous (Gam-COVID-Vac/mRNA) vaccination boost.

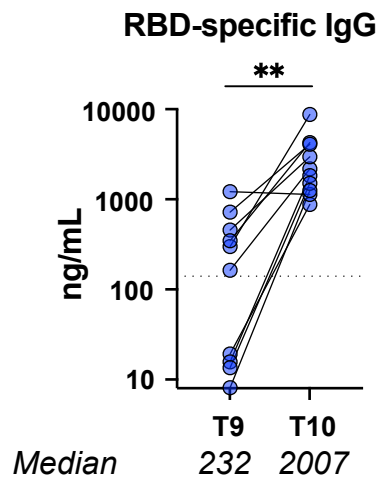

**Supplementary Figure S2.** RBD-specific IgG response in the heterologous vaccination group before (T9) and after (T10) boost mRNA vaccination.

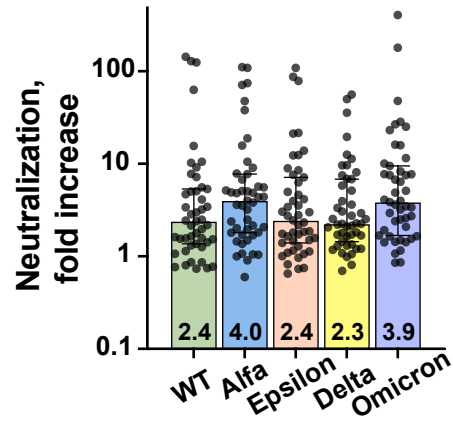

**Supplementary Figure S3.** Fold increase in SARS-CoV-2 neutralizing activity of sera after boost Gam-COVID-Vac vaccination. Virus neutralization data presented for SARS-CoV-2 wild type (WT), Alfa, Epsilon, Delta, and Omicron mutant variants. Numbers inside bars indicate median fold increase.

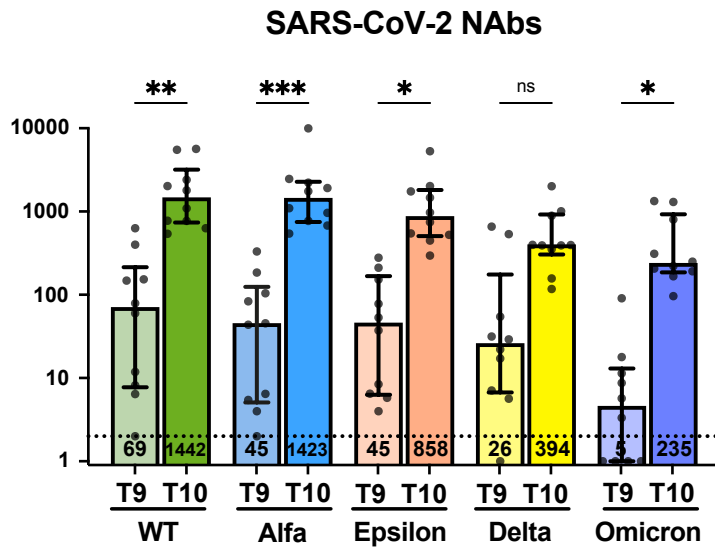

**Supplementary Figure S4.** SARS-CoV-2 NAb responses in the heterologous vaccination group against WT, Alfa, Epsilon, Delta, and Omicron VOCs after boost mRNA vaccination. Median values are indicated.

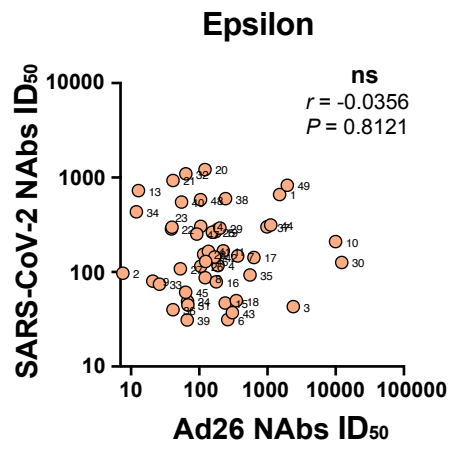

**Supplementary Figure S5.** Spearman's correlation between pre-boost (T9) Ad26-specific NAb levels and post-boost (T10) SARS-CoV-2 NAb titers against Epsilon VOC.

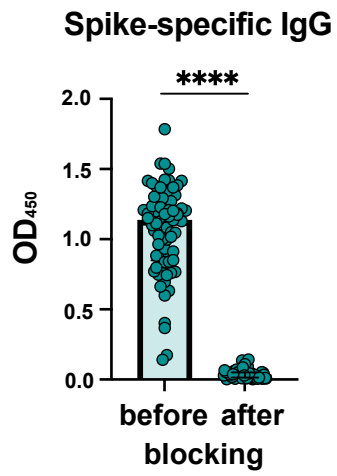

**Supplementary Figure S6.** ELISA testing of anti-Spike activity in serum samples before and after blocking with recombinant Spike protein (160  $\mu\text{g}/\text{mL}$ ).
